# Supplementary material
Source: publisher figshare collection journal article supplement (https://acs.figshare.com/ndownloader/files/5744301)

*Supporting information:*

**Copper Complexes of Nitrogen-Anchored Tripodal N-Heterocyclic  
Carbene Ligands**

Xile Hu, Ingrid Castro-Rodriguez, and Karsten Meyer\*

Department of Chemistry and Biochemistry, Mail Code 0358, University of California,  
San Diego, 9500 Gilman Drive, La Jolla, California 92093-0358 (USA)

E-mail: [kmeyer@ucsd.edu](mailto:kmeyer@ucsd.edu)

Figure S1. Cyclic voltammogram of  $[(\text{TIMEN}^{t\text{-Bu}})\text{Cu}](\text{PF}_6)$  (**11b**) recorded in acetonitrile solution containing 0.1 M  $[\text{N}(n\text{-Bu})_4](\text{ClO}_4)$  as electrolyte, showing peak separation  $|E_{\text{ox}} - E_{\text{red}}|$  and ratio of current  $I_{\text{ox}}/I_{\text{red}}$ .

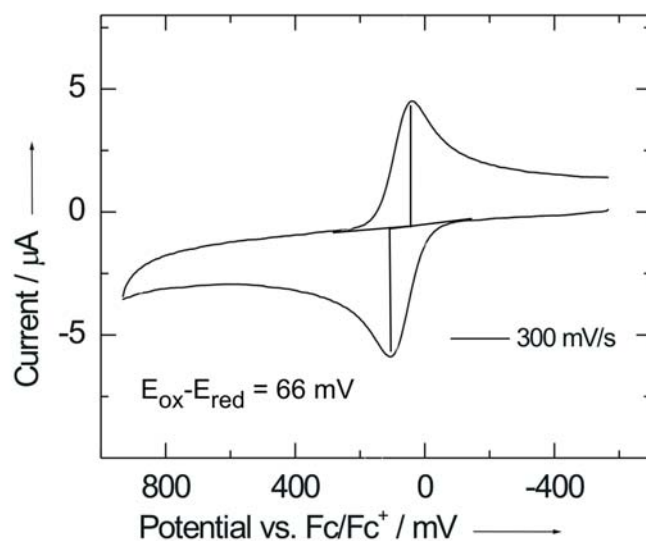

Figure S2. Cyclic voltammogram of  $[(\text{TIMEN}^{\text{Bz}})\text{Cu}](\text{Br})$  (**11c**) recorded in acetonitrile solution containing 0.1 M  $[\text{N}(\text{n-Bu})_4](\text{ClO}_4)$  as electrolyte.

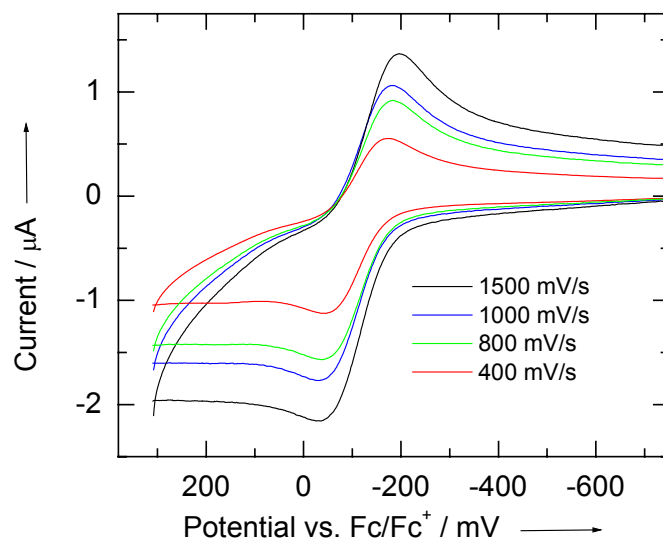

Figure S3. Energies and relative positions of metal-based frontier molecular orbitals in the system of  $[(\text{TIMEN}^{\text{Me}})\text{Cu}]^{2+}$  (alpha spin).

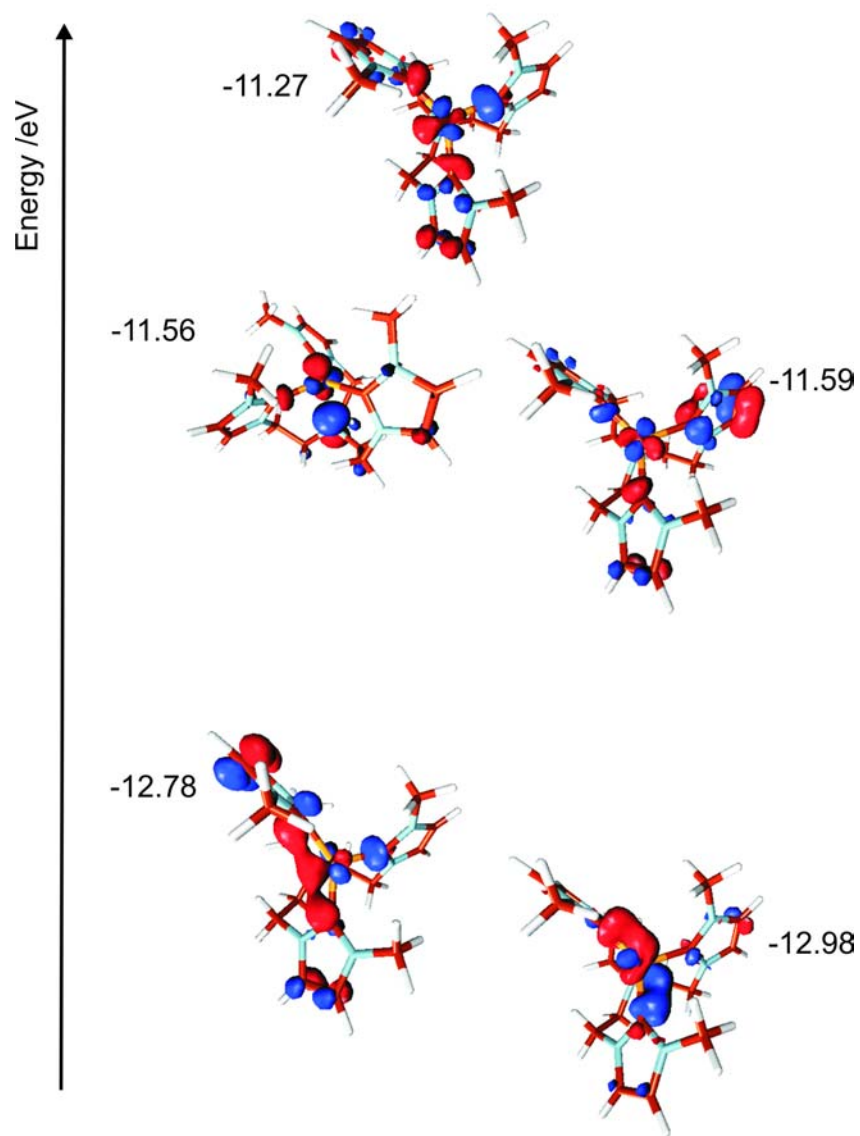

Supplement: Supplementary file 1 [file 5744301]
